# Supplementary material for: The importance of loop length on the stability of i-motif structures
Source: PubMed Central journal article supplement — Chem Commun (Camb). 2015 Feb 16;51(26):5630–2. doi: 10.1039/c4cc07279k (PMC4384421; doi:10.1039/c4cc07279k), 2015-02-16
Supplement: CC-051-C4CC07279K-s001.pdf [file CC-051-C4CC07279K-s001.pdf]

## The importance of loop length on the stability of i-motif structures

Sarah Gurung, Christine Schwartz, James P. Hall, Christine J. Cardin, and John A. Brazier

Supporting information - All data is available from the corresponding author by request.

### Experimental

All chemicals and oligonucleotides were purchased from Sigma-Aldrich. Oligonucleotides were purified by reverse phase column by Sigma-Aldrich and characteristic mass spectroscopy data is provided in table S1. UV spectroscopy was carried out using an Agilent Cary 100 with a temperature controlled 6 x 6 cell changer. CD spectra were collected on beamline B23 at Diamond Light Source.

Table S1 – Characteristic mass spectrum data for oligonucleotides used in this study.

| Name     | Sequence 5'-3'                       | Theoretical MW | Observed MW |
|----------|--------------------------------------|----------------|-------------|
| C3T333   | d(CCCTTTCCCTTTCCCTTTCCCT)            | 6452.64        | 6460.86     |
| C3T444   | d(CCCTTTTCCCTTTTCCCTTTTCCCT)         | 7365.30        | 7361.40     |
| C3T555   | d(CCCTTTTTCCCTTTTTCCCTTTTTCCCT)      | 8277.96        | 8288.85     |
| C3T666   | d(CCCTTTTTTCCCTTTTTTCCCTTTTTTCCCT)   | 9190.62        | 9205.65     |
| C3T777   | d(CCCTTTTTTTCCCTTTTTTCCCTTTTTTCCCT)  | 10103.28       | 10104.34    |
| C3T888   | d(CCCTTTTTTTTCCCTTTTTTCCCTTTTTTCCCT) | 11015.94       | 11019.20    |
| C3T338   | d(CCCTTTCCCTTTCCCTTTTTTTCCC)         | 7669.52        | 7673.01     |
| C3T383   | d(CCCTTTCCCTTTTTTTCCCTTTCCC)         | 7669.52        | 7674.29     |
| C3T833   | d(CCCTTTTTTTCCCTTTCCCTTTCCC)         | 7669.52        | 7674.29     |
| C3T883   | d(CCCTTTTTTTTCCCTTTTTTTCCCTTTCCC)    | 9190.62        | 9190.70     |
| C3T838   | d(CCCTTTTTTTTCCCTTTCCCTTTTTTTCCC)    | 9190.62        | 9193.90     |
| C3T388   | d(CCCTTTCCCTTTTTTTCCCTTTTTTTCCC)     | 9190.62        | 9189.10     |
| C3T8AA38 | d(CCCTTAAATTTCCCTTTCCCTTTTTTTCCC)    | 9208.94        | 9216.12     |
| C3T838AA | d(CCCTTTTTTTTCCCTTTCCCTTAAATTTCCC)   | 9208.94        | 9212.72     |

### Oligonucleotide Concentrations

The concentration of all oligonucleotides were calculated from the absorbance value at 260 nm using extinction coefficients calculated using the nearest neighbour method.

### UV melting experiments

Oligonucleotides were dissolved in 50 mM sodium cacodylate buffer of the appropriate pH to a final concentration of 1  $\mu$ M, and were annealed by heating to 90°C and slowly cooling to room temperature. UV spectra were recorded at 260 and 295 nm at 1°C intervals between 20-90 °C, with a temperature change rate of 1°C/min in a 1cm pathlength cuvette.

### UV pH titrations

Oligonucleotides were dissolved in 50 mM sodium cacodylate at pH 8, and a spectrum recorded between 200-350 nm. The pH was adjusted by the addition of small aliquots (approximately 1  $\mu$ L) of HCl and measured in the cuvette using a Thermo Scientific Orion Star A11 pH meter equipped with a

small diameter pH electrode. A UV spectrum was recorded between 200-350 nm wavelengths at 25°C for each pH point.

### CD Spectroscopy

Oligonucleotides were dissolved in 20 mM sodium cacodylate buffer of the appropriate pH to a final concentration of 5  $\mu$ M, and were annealed by heating to 90°C and slowly cooling to room temperature. CD spectra were recorded at 20 °C between 200 and 350 nm wavelengths with 1 nm wavelength increments in a 1cm pathlength cuvette on beamline B23 at Diamond Light Source.

UV melting data for C3T333-C3T888 at 295 nm

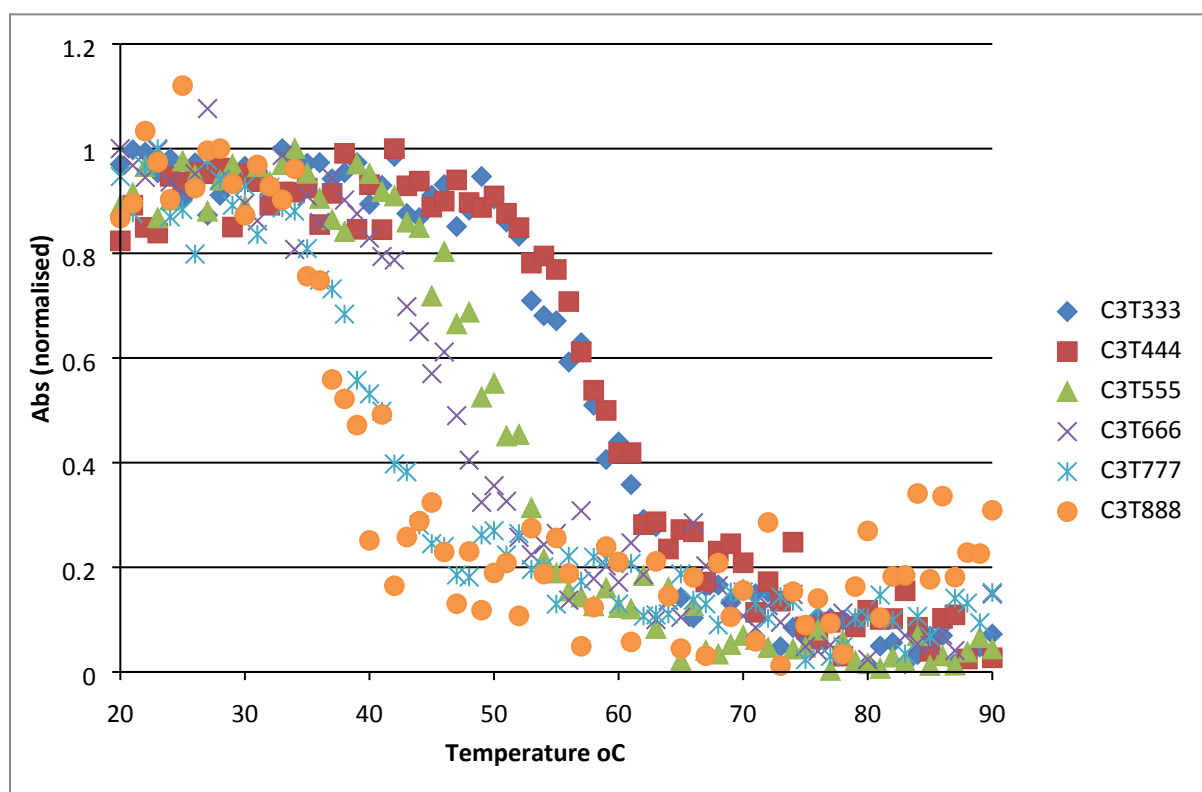

Figure S1 – UV melting curves for C3TXXX at 295 nm where X = 3-8

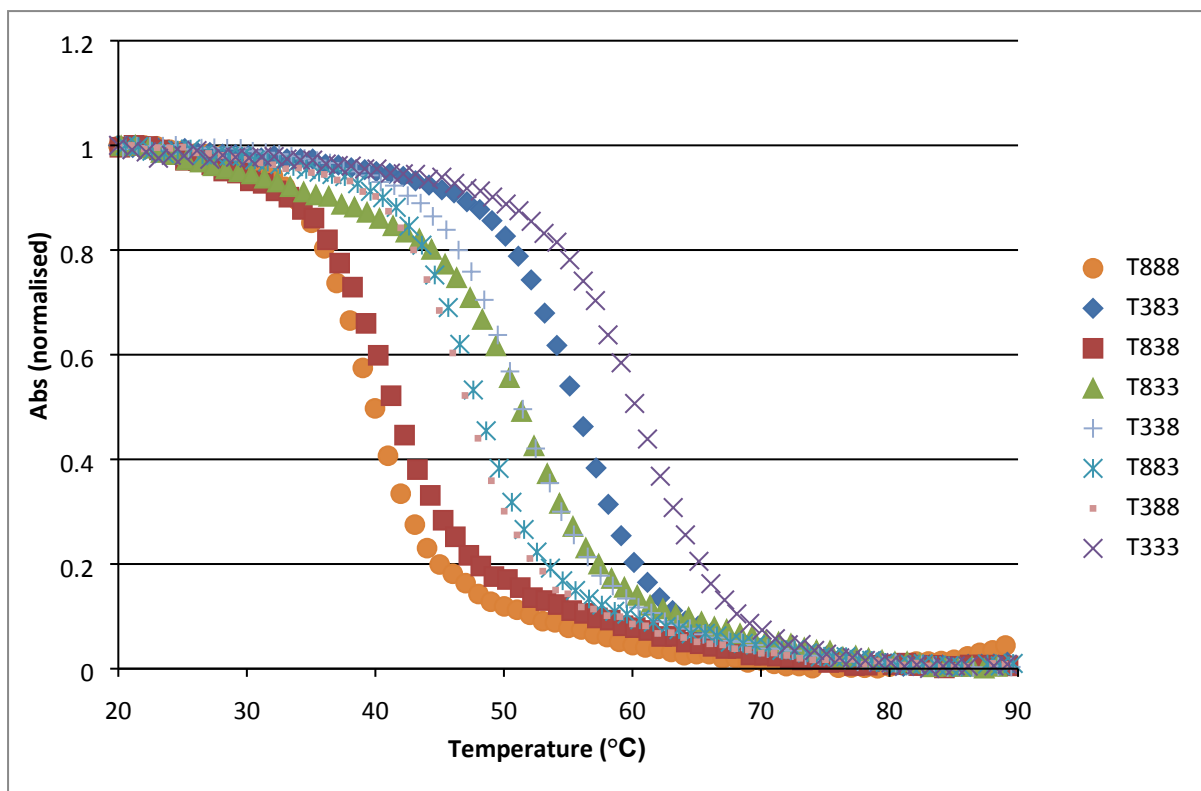

Figure S2 – UV melting curves for C3TXYZ at 295 where X, Y and Z = 3 or 8

UV pH titrations

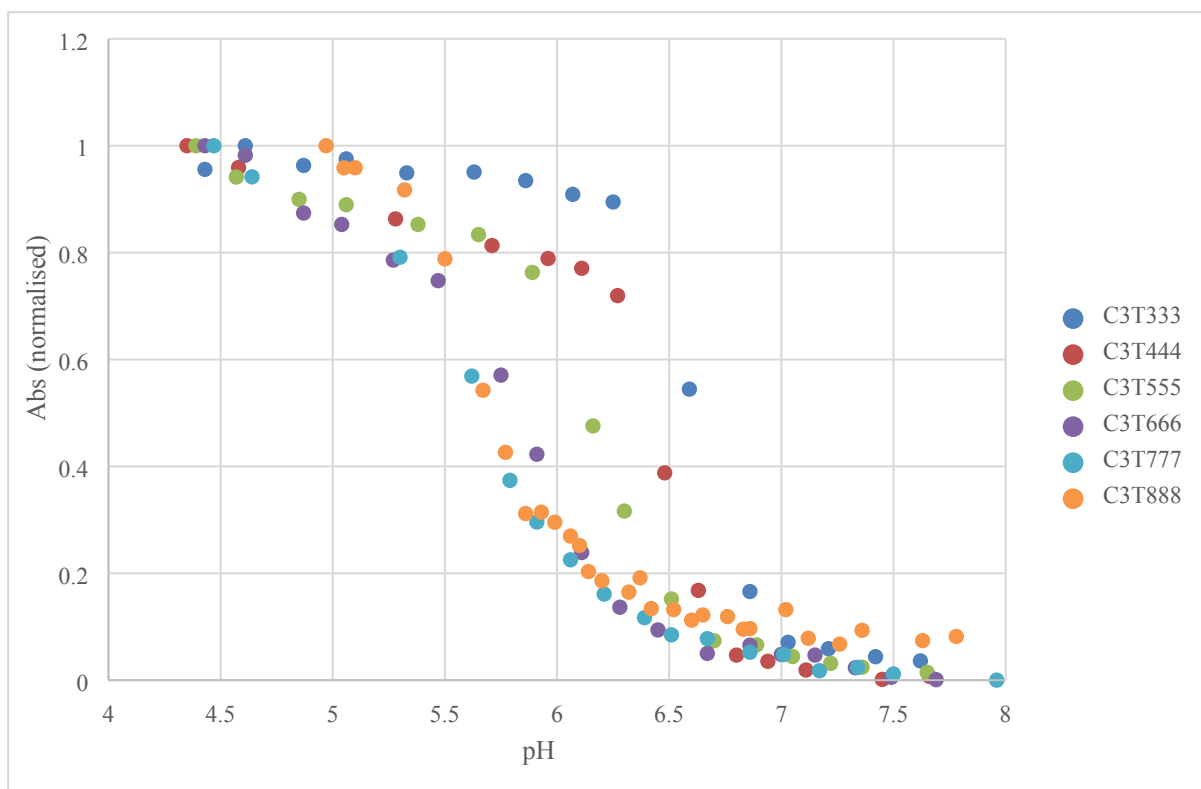

Figure S3 – UV pH titrations of C3TXXX at 295 where X = 3-8

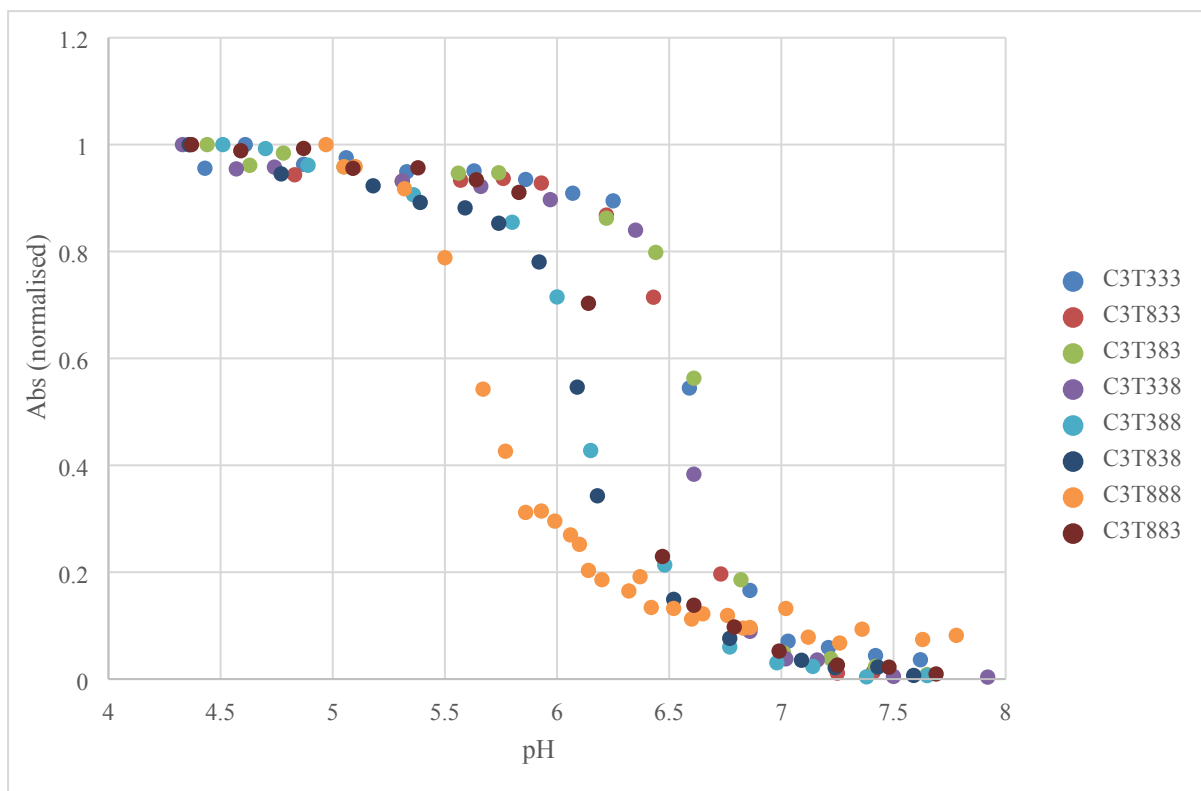

Figure S4 - UV pH titrations of C3TXYZ at 295 where X, Y and Z = 3 or 8

UV melting for sequences containing AA loops

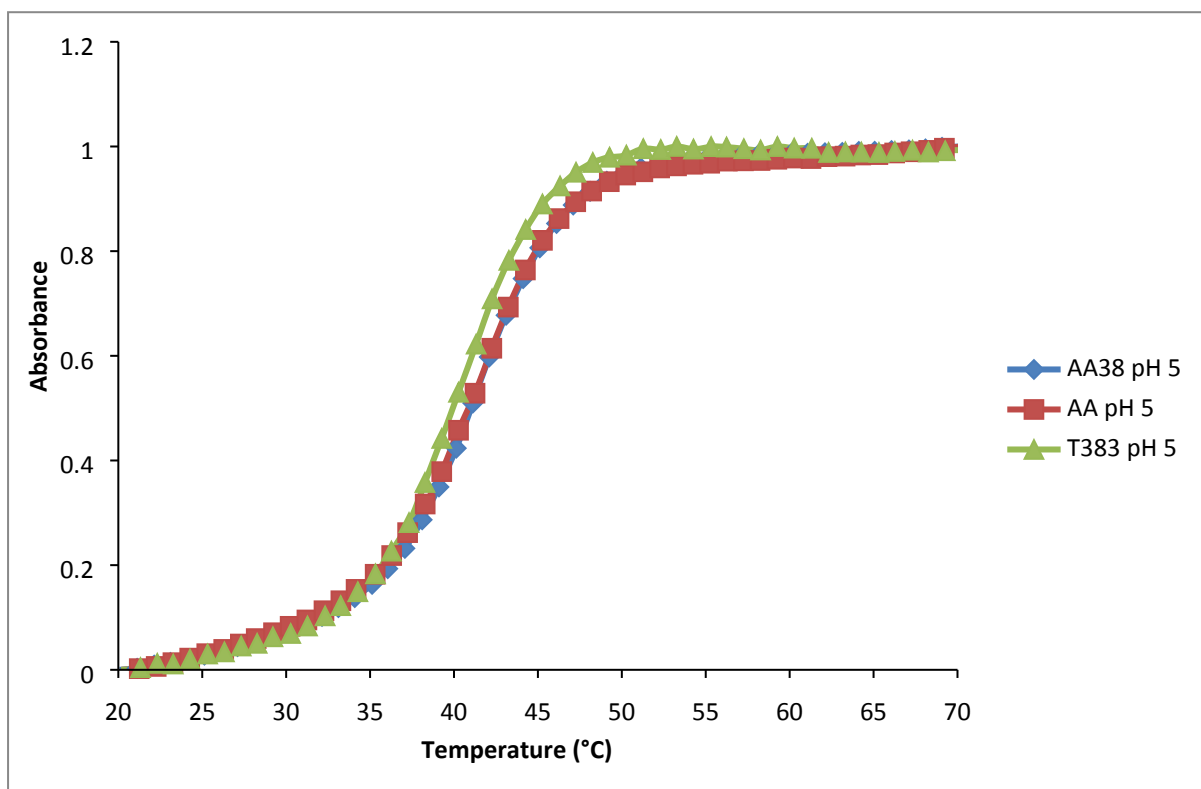

Figure S5 - UV melting curves for C3(AA)T38 ( $d(C_3TTTAATTC_3T_3C_3T_8C_3)$ ), C3T83(AA) ( $d(C_3T_8C_3T_3C_3TTTAATTC_3)$ ) and C3T838 at 260nm. 50 mM sodium cacodylate pH 5

UV melting at different salt concentrations

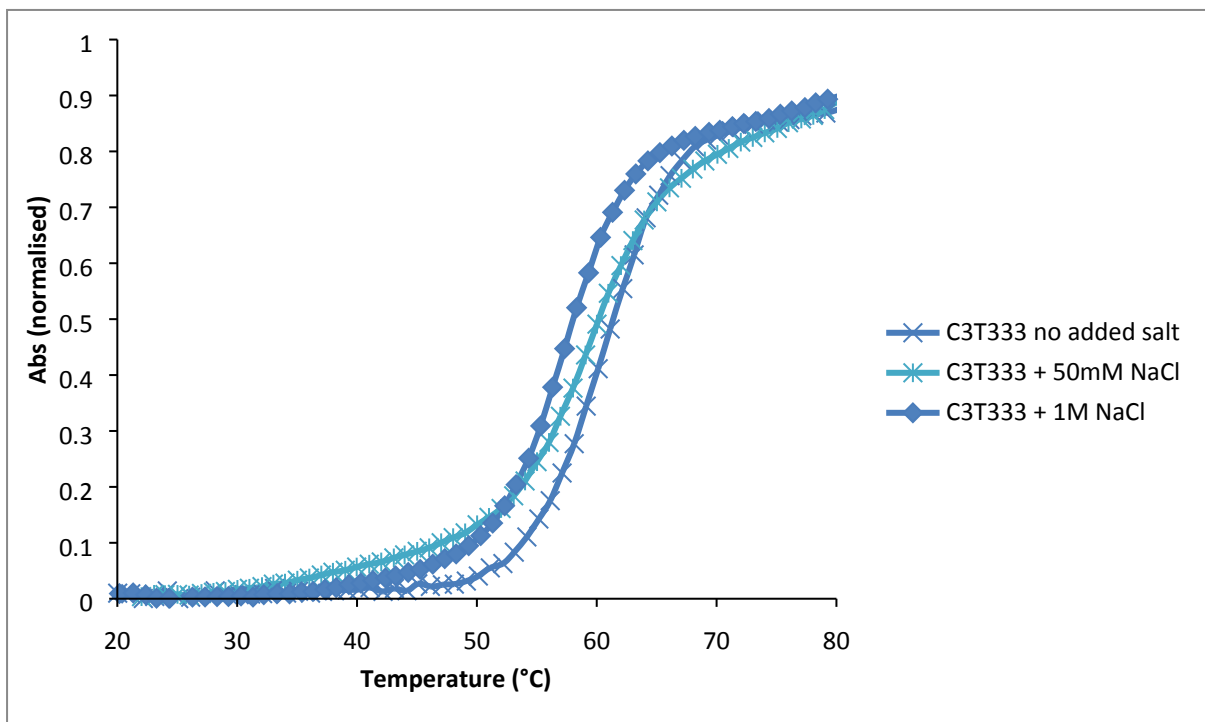

Figure S6 - UV melting curves of C3T333 with increasing salt concentration.

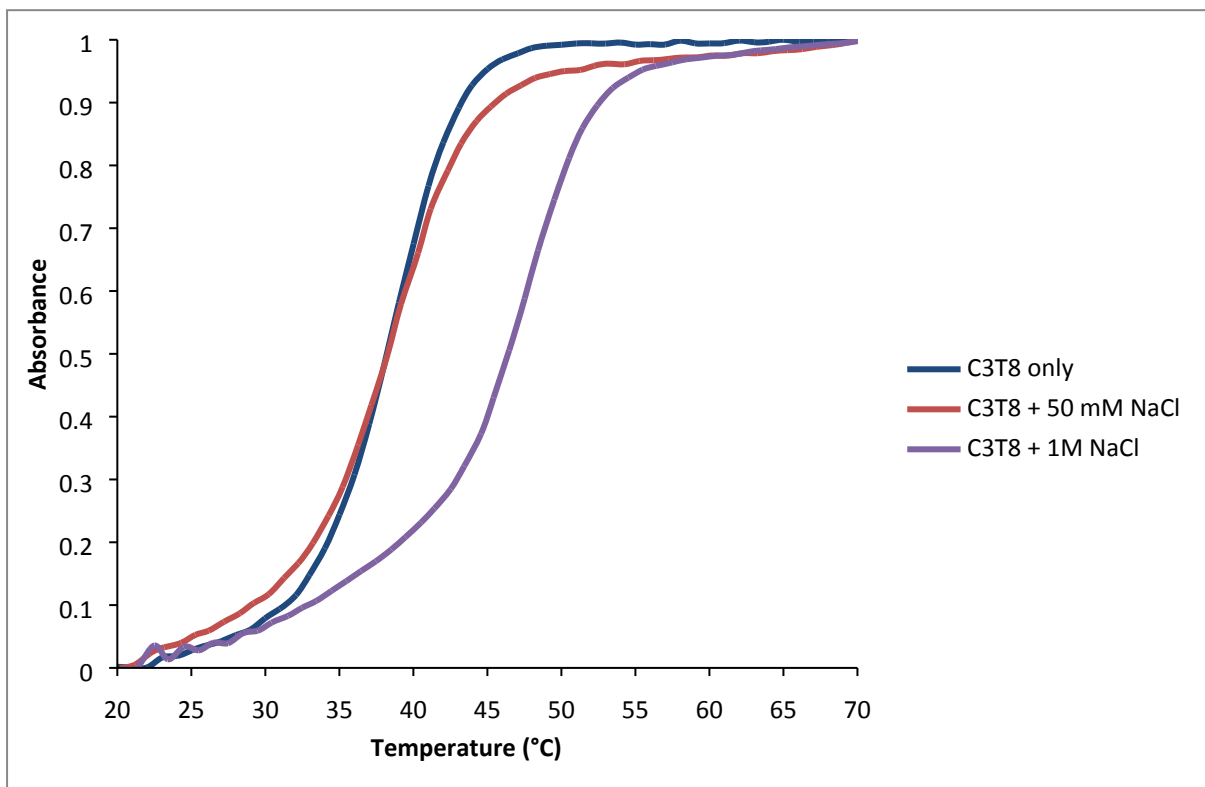

Figure S7 - UV melting curves of C3T888 with increasing salt concentration.

CD Spectra

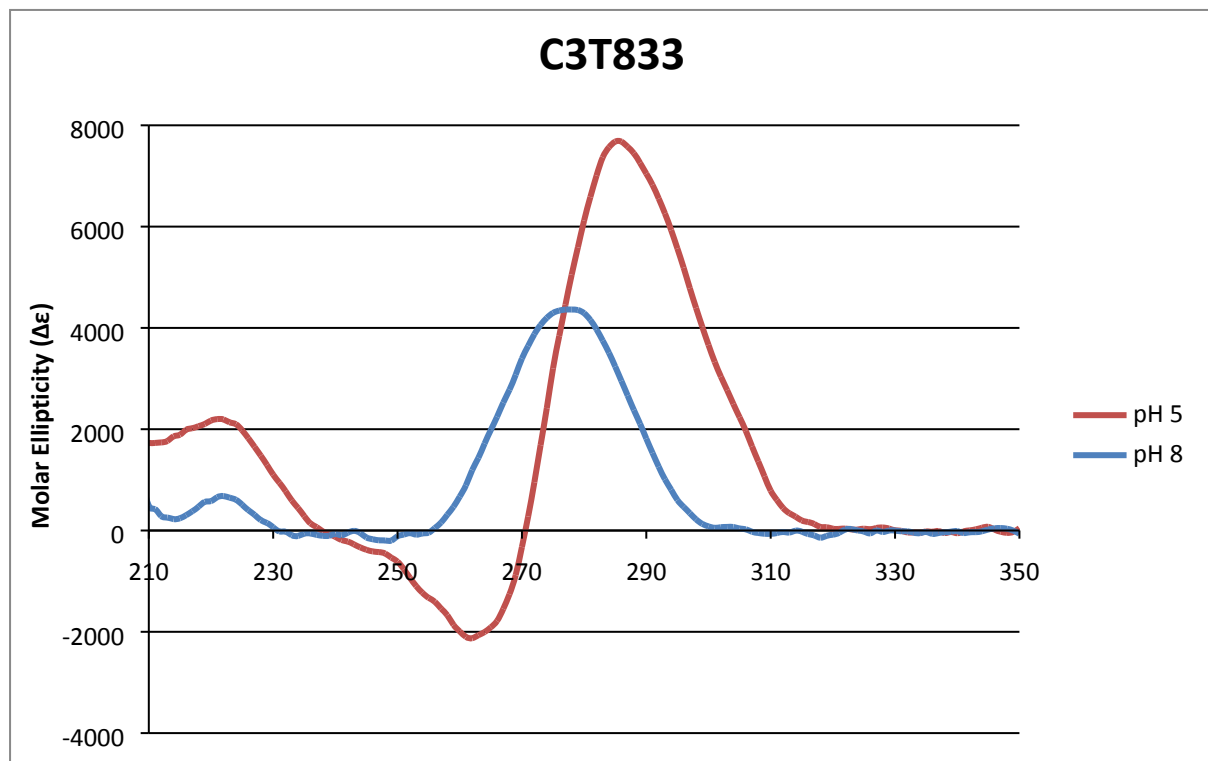

Figure S8 – CD Spectra of C3T833 at pH 5 and 8

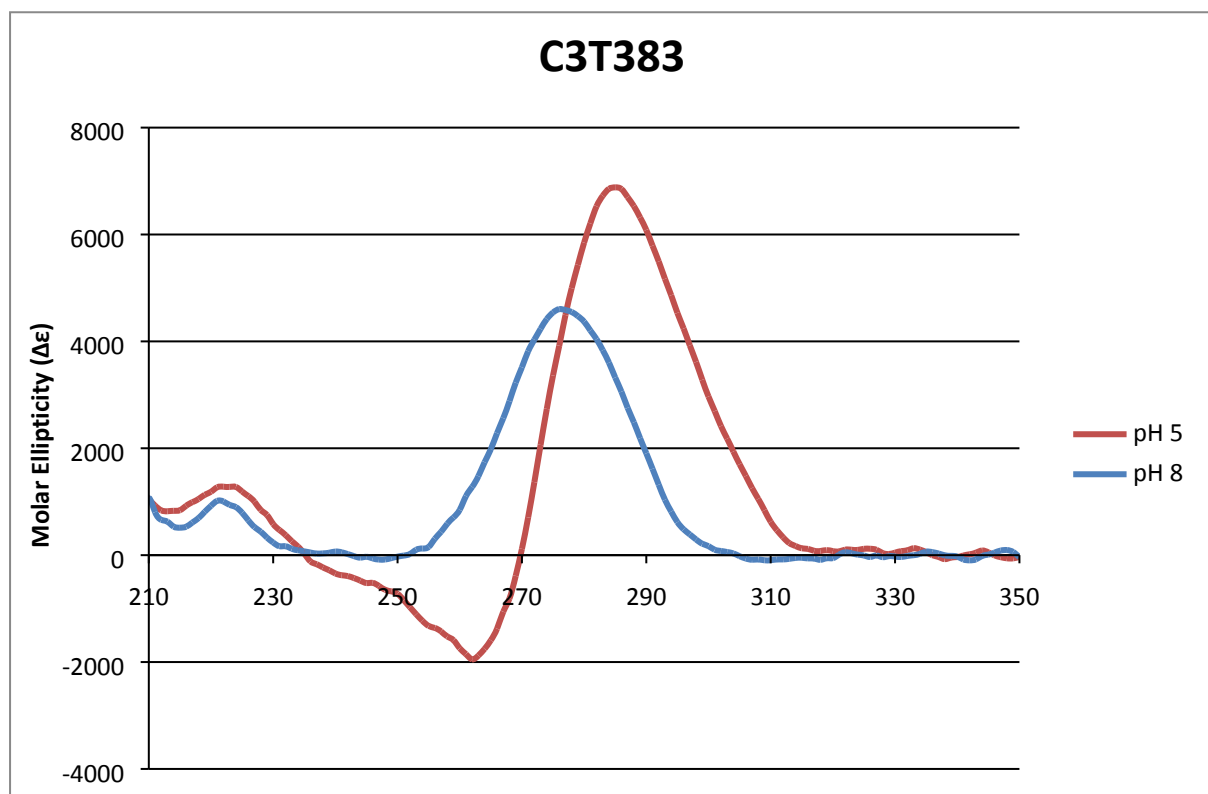

Figure S9 – CD Spectra of C3T383 at pH 5 and 8

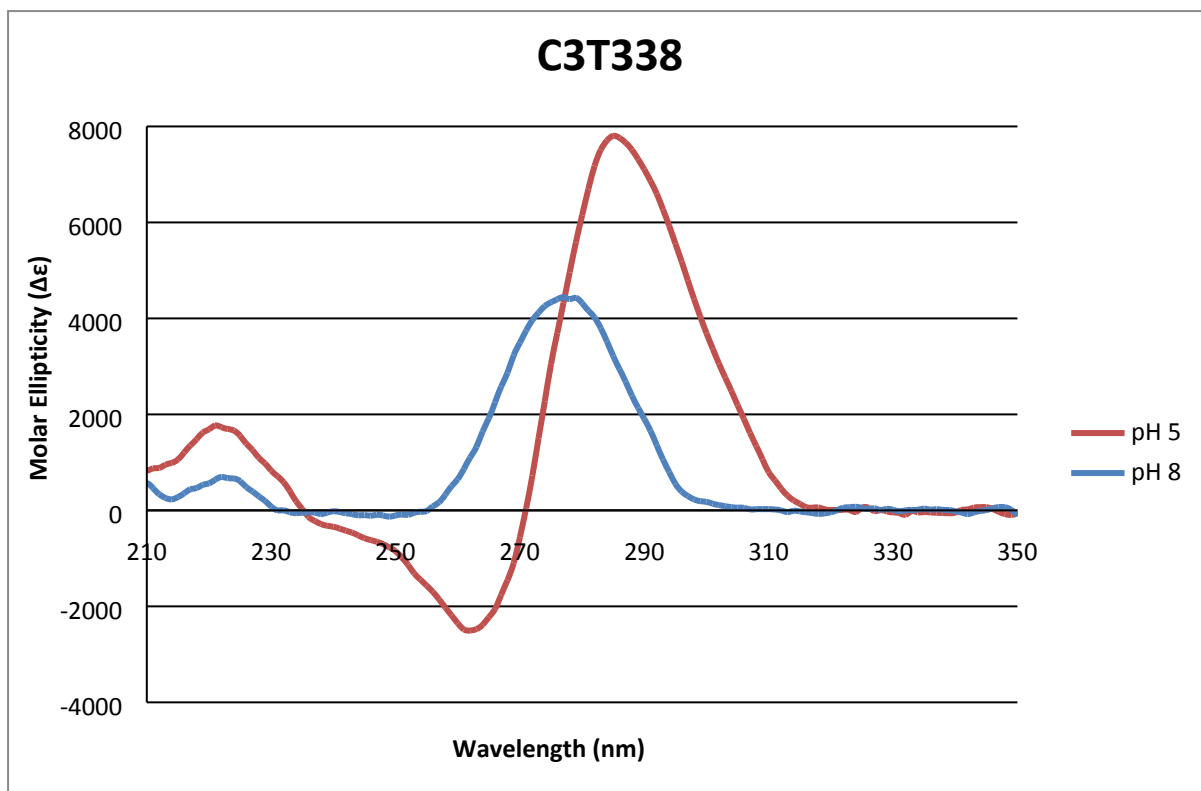

Figure S10 – CD Spectra of C3T338 at pH 5 and 8

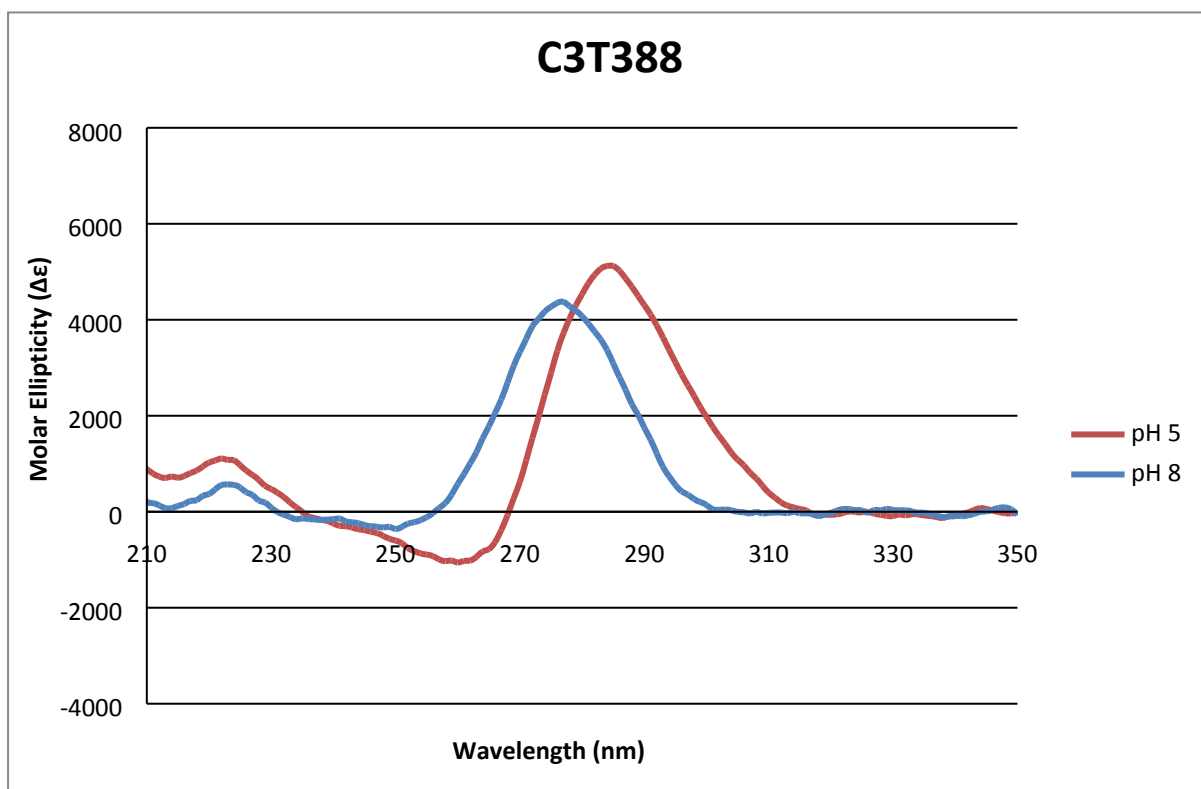

Figure S11 – CD Spectra of C3T388 at pH 5 and 8

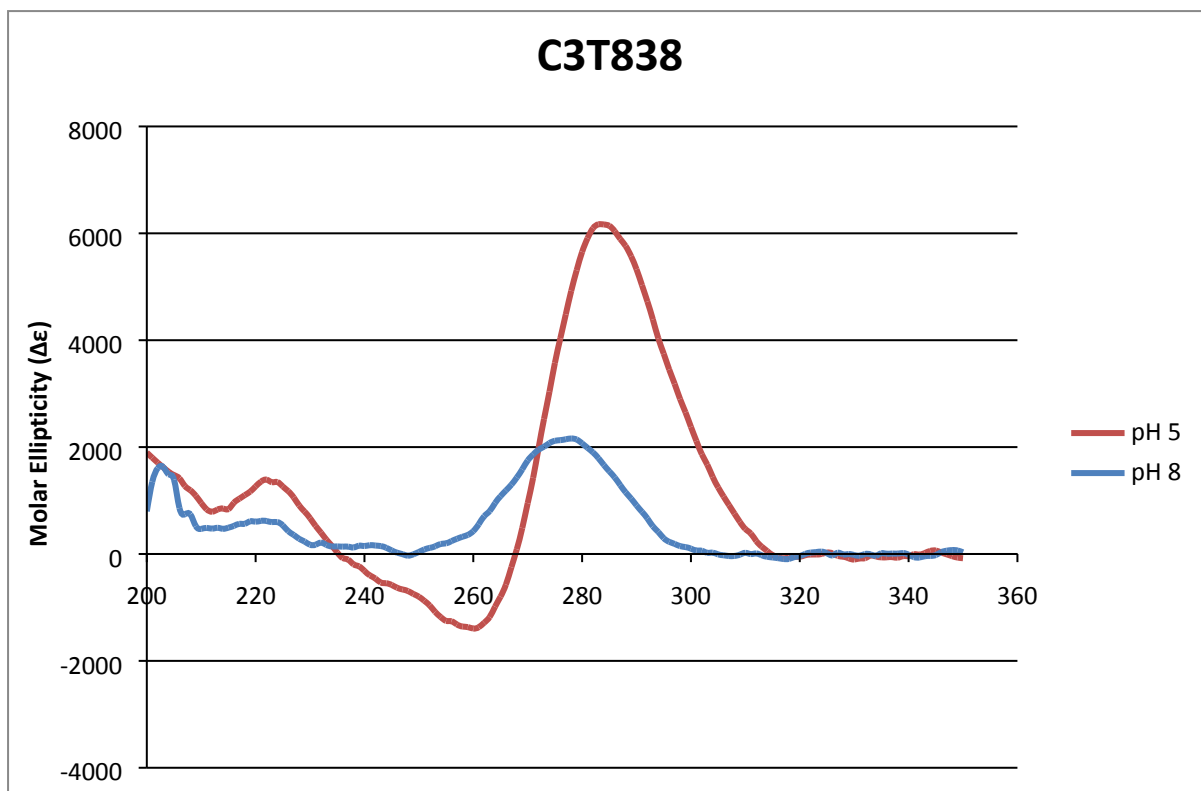

Figure S12 – CD Spectra of C3T838 at pH 5 and 8

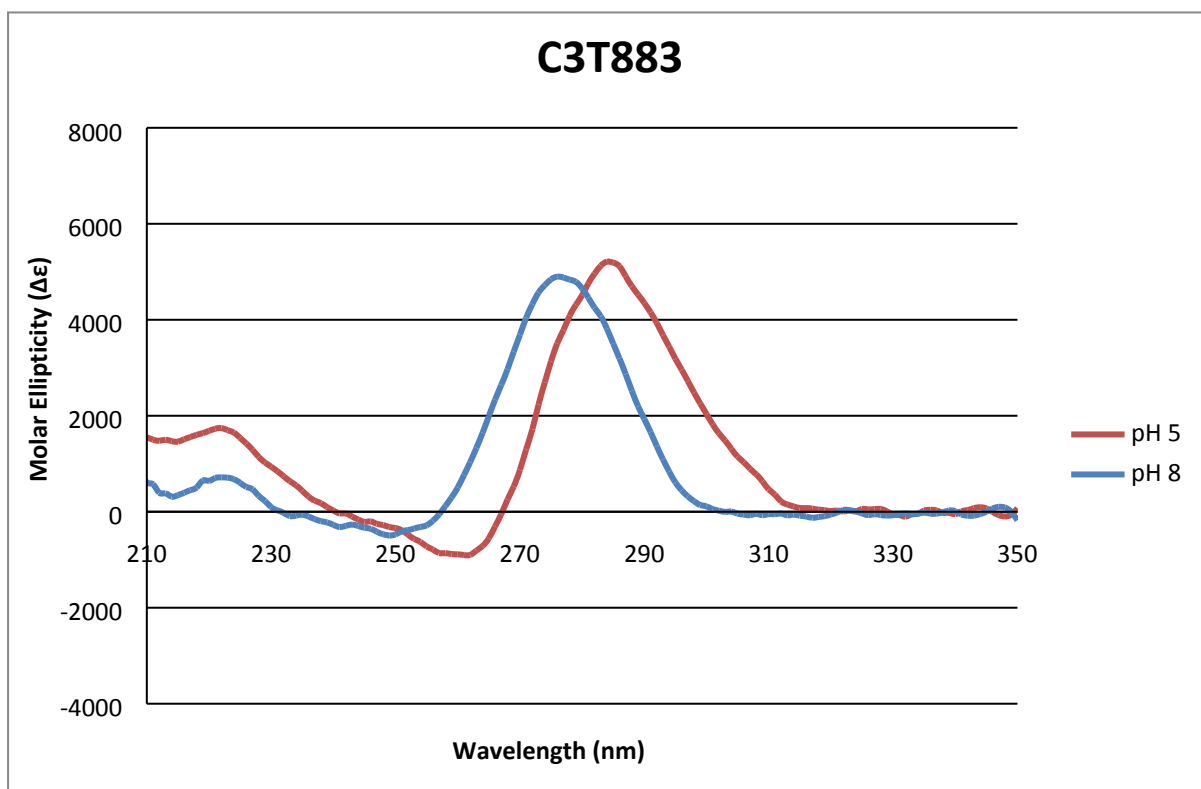

Figure S13 – CD Spectra of C3T883 at pH 5 and 8
